# Supplementary material for: Advances in Understanding the Relationship between Sleep and Attention Deficit-Hyperactivity Disorder (ADHD)
Source: MDPI journal article supplement (doi:10.3390/jcm8101737), 2019-10-19
Supplement: s1 [file s1]

**Table 1. List of abbreviations.** The abbreviations including in the text are reported alphabetically.

| Abbreviation | Full form                                                         | Definition                                                                                                                                                                                                                                                                                                             |
|--------------|-------------------------------------------------------------------|------------------------------------------------------------------------------------------------------------------------------------------------------------------------------------------------------------------------------------------------------------------------------------------------------------------------|
| ADHD         | Attention-Deficit Hyperactivity Disorder                          | ADHD is one of the most common early childhood disorders, classified into three subtypes: predominantly inattentive, hyperactive-impulsive, and a combination of these two subtypes.                                                                                                                                   |
| CAP          | Cycling Alternating Pattern                                       | CAP is an EEG activity during NREM sleep that may represent an index of arousal and sleep instability.                                                                                                                                                                                                                 |
| DSM          | Diagnostic And Statistical Manual Of Mental Disorders             | DSM is one of the most used diagnostic manual by clinicians in the filed of mental health.                                                                                                                                                                                                                             |
| EEG          | Electroencephalographic/Electr oencephalography                   | EEG measures the electrical brain activity through electrodes placed on the scalp.                                                                                                                                                                                                                                     |
| HC           | Healthy Children                                                  | The group of HC the controls with a typical development represents in the mentioned studies.                                                                                                                                                                                                                           |
| IAPS         | International Affective Picture System                            | IAPS is a database containing a standardized set of pictures for studying attention and emotion.                                                                                                                                                                                                                       |
| IQ           | Intellectual Quotient                                             | IQ is a score obtained from a standardized tests designed to evaluate the human intellectual functioning.                                                                                                                                                                                                              |
| MSLT         | Multiple Sleep-Onset Latency Test                                 | MSLT is used to assess excessive sleepiness and diagnose narcolepsy. Subjects have a series of nap opportunities across the day.                                                                                                                                                                                       |
| MST          | Motor Sequence Task                                               | MST is designed to assess procedural skill learning. It required participants to tap a 5-element on the numeric keys of a keyboard with the fingers of their non-dominant hand "as quickly and accurately as possible" for 30 seconds. The task is administered at the evening and at the morning session after sleep. |
| NREM         | Non Rapid Eye Movement                                            | NREM sleep is divided into four stages in the Rechtschaffen and Kales standardization: stage 1, stage 2, stage 3 and stage 4.                                                                                                                                                                                          |
| ODD          | Oppositional Defiant Disorder                                     | ODD is a neurodevelopmental disorder characterized by frequent and persistent angry/irritable mood, argumentative/defiant behavior, or vindictiveness in children and adolescents. The disorder is often comorbid with ADHD.                                                                                           |
| PLMS/PLMD    | Periodic Limb Movements Of Sleep/ Periodic Limb Movement Disorder | PLMS/PLMD is a disorder characterized by repetitive and involuntary movements in the lower limbs, that occur about every 20-40 seconds during sleep.                                                                                                                                                                   |
| PSG          | Polysomnographic/Polysomnography                                  | PSG is a tool used to records brain waves and other parameters (e.g., eye movements, muscular tone, heart rate) during sleep. It is helpful to diagnose sleep abnormalities.                                                                                                                                           |
| REM          | Rapid Eye Movement                                                | REM sleep is the stage characterized by rapid eye movements, frequent mental sleep activity and muscle atonia.                                                                                                                                                                                                         |
| SDB          | Sleep-Disordered Breathing                                        | SDB refers to several chronic conditions in which partial or complete cessation of breathing occurs across the night.                                                                                                                                                                                                  |
| SE           | Sleep Efficiency                                                  | SE is the percentage of time spent asleep. It is represented by the ratio between the amount of total sleep time and the total time in bed. A SE of 85% or higher is considered to be normal.                                                                                                                          |
| SOL          | Sleep Onset Latency                                               | SOL is the duration of time it takes to fall asleep after the lights have been turned off/after "the goodnight".                                                                                                                                                                                                       |
| SPT          | Sleep Period Time                                                 | SPT is the amount of time from sleep onset to sleep end.                                                                                                                                                                                                                                                               |
| SS           | Stage Shift                                                       | SS indicates a transition from a sleep stage to another.                                                                                                                                                                                                                                                               |

|      |                               |                                                                                                                                                                                   |
|------|-------------------------------|-----------------------------------------------------------------------------------------------------------------------------------------------------------------------------------|
|      |                               | High rate of SS may result in complaints of non-restorative sleep.                                                                                                                |
| SWA  | Slow Wave Activity            | SWA is an EEG synchronized activity ranged from 0.5 to 4.0 Hz. In healthy people, it is maximally expressed during NREM sleep.                                                    |
| SWS  | Slow Wave Sleep               | SWS refers to the deep NREM sleep, consists of stage 3 and stage 4.                                                                                                               |
| TBT  | Total Bed Time                | TBT represents the total time in bed.                                                                                                                                             |
| TST  | Total Sleep Time              | TST is the amount of time spent asleep from sleep onset to the end of the final sleep epoch. Differently from SPT, this index does not include the wakefulness after sleep onset. |
| WASO | Wakefulness After Sleep Onset | WASO is the amount of time spent awake, starting from the sleep onset to the last awakening.                                                                                      |
